# Supplementary material for: Griseofulvin Inhibits Root Growth by Targeting Microtubule-Associated Proteins Rather Tubulins in Arabidopsis
Source: MDPI journal article supplement (doi:10.3390/ijms24108692), 2023-05-12
Supplement: s1 [file s1]

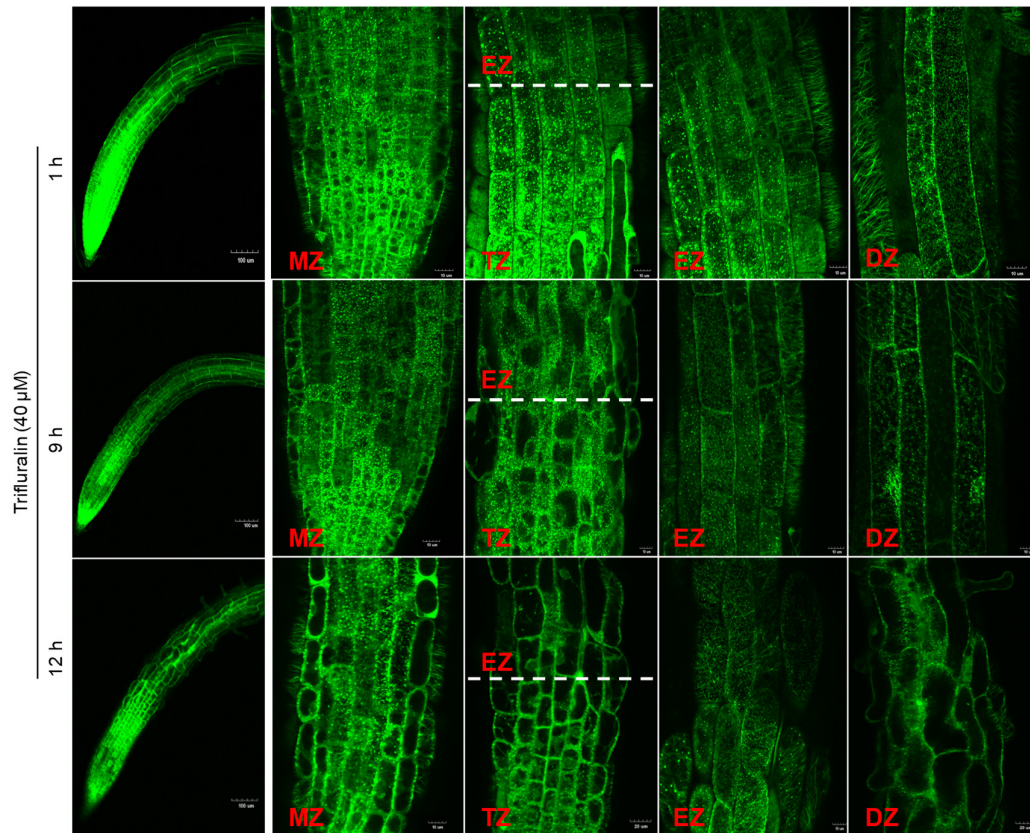

**Figure S2.** Effect of 40  $\mu\text{M}$  trifluralin on microtubule dynamics of root tip cells in *Arabidopsis*.

Five-day-old MBD-GFP seedlings growth on the conventional 1/2 MS medium were transferred onto 1/2 MS medium 40  $\mu\text{M}$  of trifluralin and then incubated for 1, 9 and 12 h. The overall morphology (left, scale bar: 100  $\mu\text{m}$ ) and microtubule dynamics (right, scale bar: 10  $\mu\text{m}$  or 20  $\mu\text{m}$ ) of different zones of root tips after trifluralin incubation were shown. Results represent three independent biological replicates.
