# Supplementary material for: Griseofulvin Inhibits Root Growth by Targeting Microtubule-Associated Proteins Rather Tubulins in Arabidopsis
Source: MDPI journal article supplement (doi:10.3390/ijms24108692), 2023-05-12
Supplement: s1 [file s1]

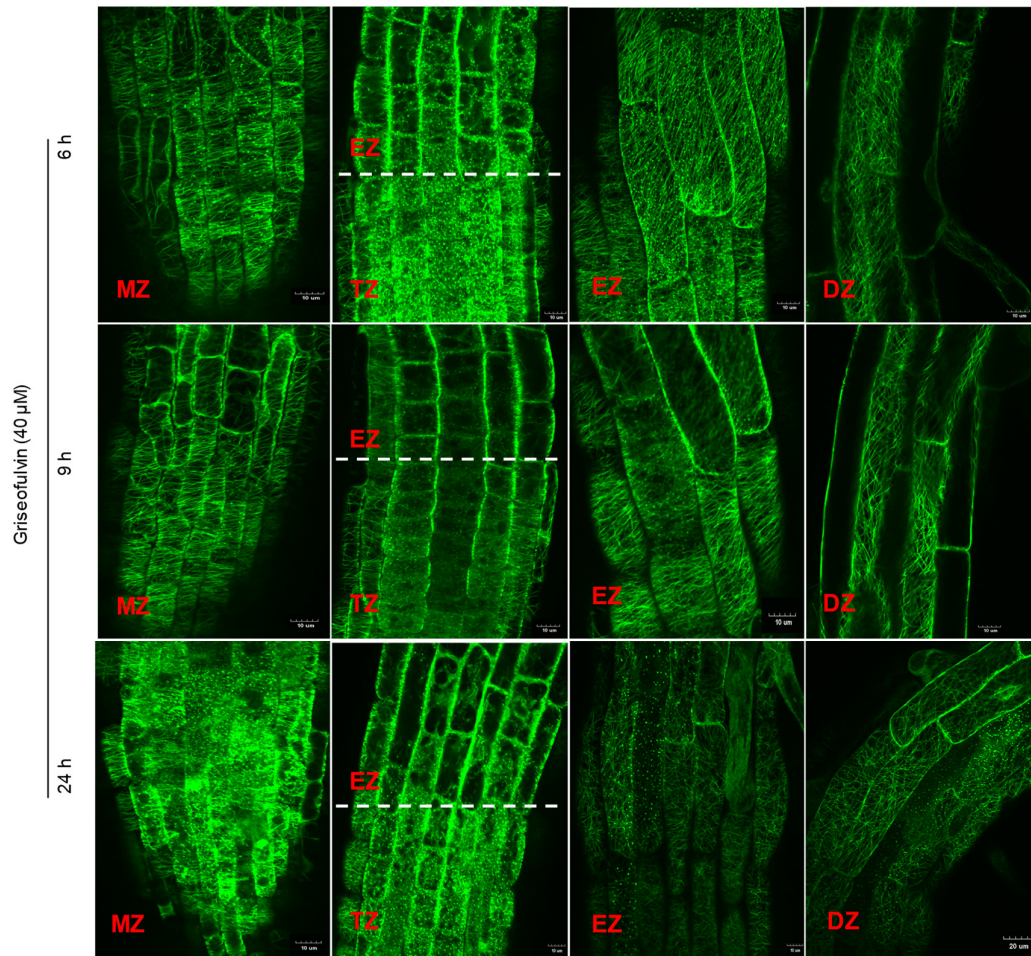

**Figure S1.** Effect of 40  $\mu\text{M}$  griseofulvin on microtubule dynamics of root tip cells in *Arabidopsis*.

Five-day-old MBD-GFP seedlings growth on the conventional 1/2 MS medium were transferred onto 1/2 MS medium 40  $\mu\text{M}$  of griseofulvin and then incubated for 6, 9 and 24 h. Microtubule dynamics of different zones of root tips after griseofulvin incubation were shown. Results represent three independent biological replicates. Scale bar: 10  $\mu\text{m}$  or 20  $\mu\text{m}$ .
