# Supplementary material for: Griseofulvin Inhibits Root Growth by Targeting Microtubule-Associated Proteins Rather Tubulins in Arabidopsis
Source: MDPI journal article supplement (doi:10.3390/ijms24108692), 2023-05-12
Supplement: s1 [file s1]

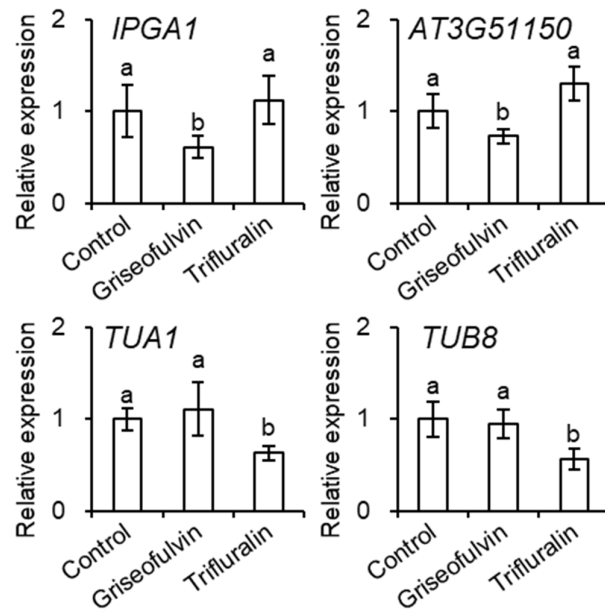

**Figure S3.** The expression levels of selected plant MAPs and tubulin-related genes including *IPGA1*, *AT3G51150*, *TUA1* and *TUB8* in Col-0 seedlings inoculated with griseofulvin or trifluralin were measured by quantitative PCR (qRT-PCR). Gene expression levels were normalized to *ACTIN2*. Data are mean  $\pm$  SE of three independent biological replicates. The different small letters above error bars indicate significant difference at 0.05 level.
